# Supplementary material for: Regenerative silver nanoparticles for SERRS investigation of metmyoglobin with conserved heme pocket
Source: Royal Society of Chemistry journal article supplement (doi:10.1039/c3ra40842f), 2013-01-01
Supplement: c3ra40842f.pdf [file c3ra40842f.pdf]

# **Regenerative Silver Nanoparticles for SERRS Investigation of Metmyoglobin with Conserved Heme Pocket**

**Govindasamy Kalaivani,<sup>a</sup> N. S. Venkata Narayanan,<sup>b</sup> Arumugam Sivanesan,<sup>\*c</sup> Ayyadurai  
Kannan,<sup>a</sup> Agnieszka Kaminska<sup>c</sup> and Ranganathan Sevel<sup>\*a</sup>**

<sup>a</sup> Department of Chemistry, Vivekananda College, Tiruvedagam West, Madurai - 625 234,  
Tamilnadu, India. E-mail: [rsevel@yahoo.com](mailto:rsevel@yahoo.com); Tel: +91 9865708536;  
Fax: +91 4543 258358.

<sup>b</sup> Department of Chemistry, Imperial College London, South Kensington  
Campus, London SW7 2AZ, United Kingdom.

<sup>c</sup> Institute of Physical Chemistry, Polish Academy of Sciences, Kasprzaka  
44/52, 01-224 Warsaw, Poland. E-mail: [asnesan@gmail.com](mailto:asnesan@gmail.com).

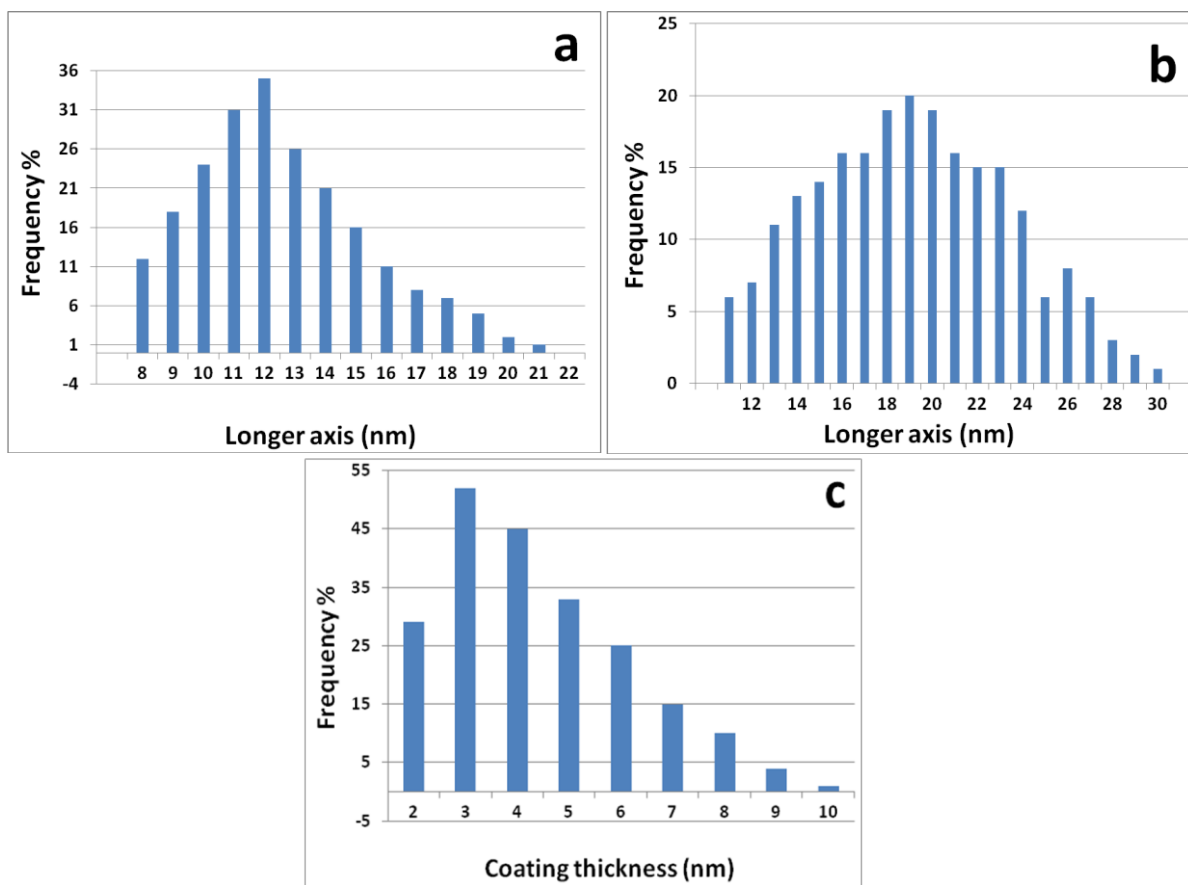

**Fig. S1** Size distribution of (a) sodium borohydride reduced seed Ag@citrate NPs (205) and (b) Ag@SiO<sub>2</sub> NPs calculated from longer axis of the particles (225). (c) Distribution of silica coating thickness of Ag@SiO<sub>2</sub> NPs (214). The numbers given in bracket are the number of nanoparticles counted for the measurement.

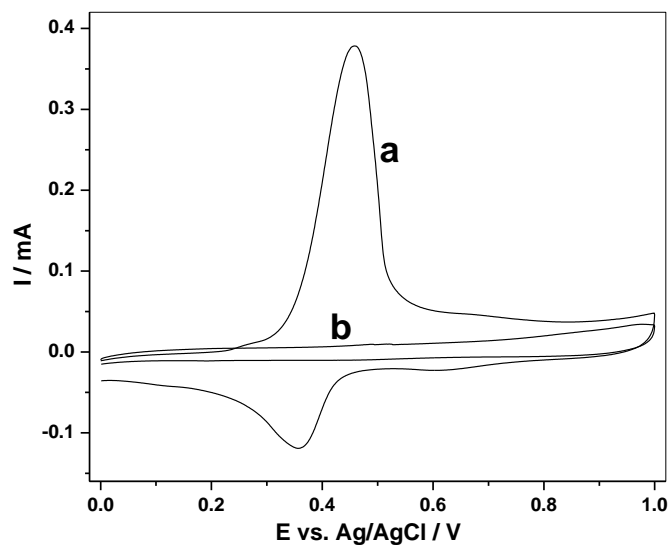

**Fig. S2** Cyclic voltammogram of (a) enlarged Ag@citrate NPs and (b) Ag@SiO<sub>2</sub> NPs coated glassy carbon electrode in 0.1 M H<sub>2</sub>SO<sub>4</sub> at a scan rate of 0.1 Vs<sup>-1</sup>.

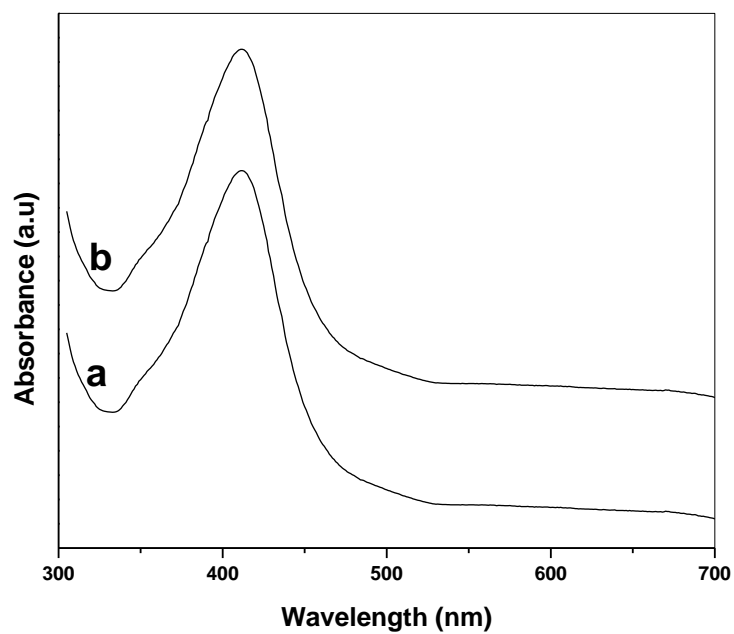

**Fig. S3** UV-visible spectra of (a) freshly prepared Ag@SiO<sub>2</sub> NPs and (b) regenerated Ag@SiO<sub>2</sub> NPs after SERRS study with metMb.

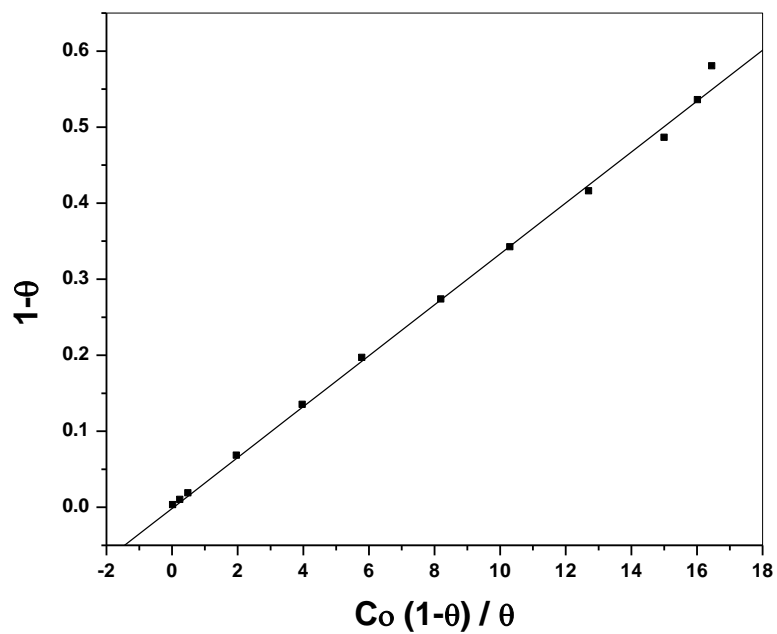

**Fig. S4** Langmuir adsorption isotherm plot for the determination of real surface coverage ( $\Gamma_s^*$ ) and equilibrium constant (K).

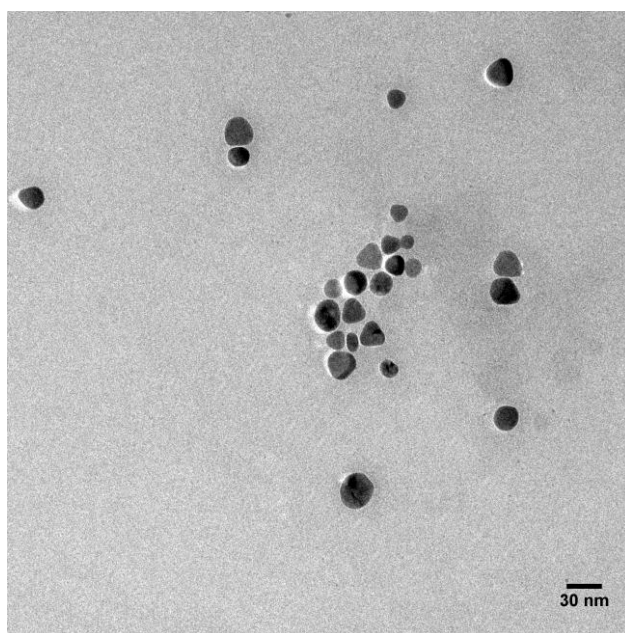

**Fig. S5** TEM pictures of enlarged Ag@citrate NPs.

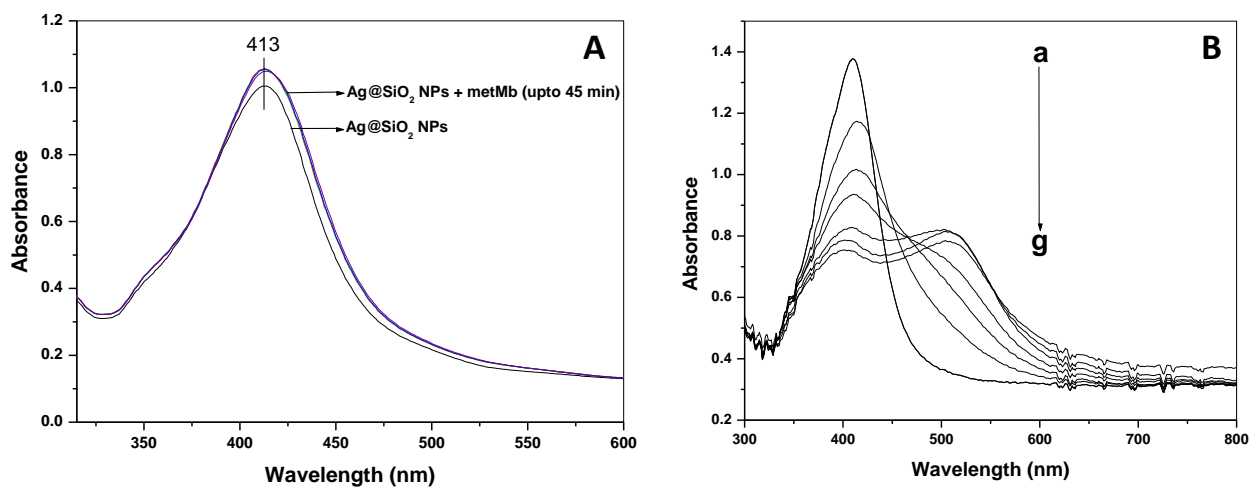

**Fig. S6** UV-visible spectra of (A) Ag@SiO<sub>2</sub> NPs before and after the addition of metMb (B) enlarged Ag@citrate NPs (a) before and (b-g) after the addition of metMb with respect to time (0 - 45 min).

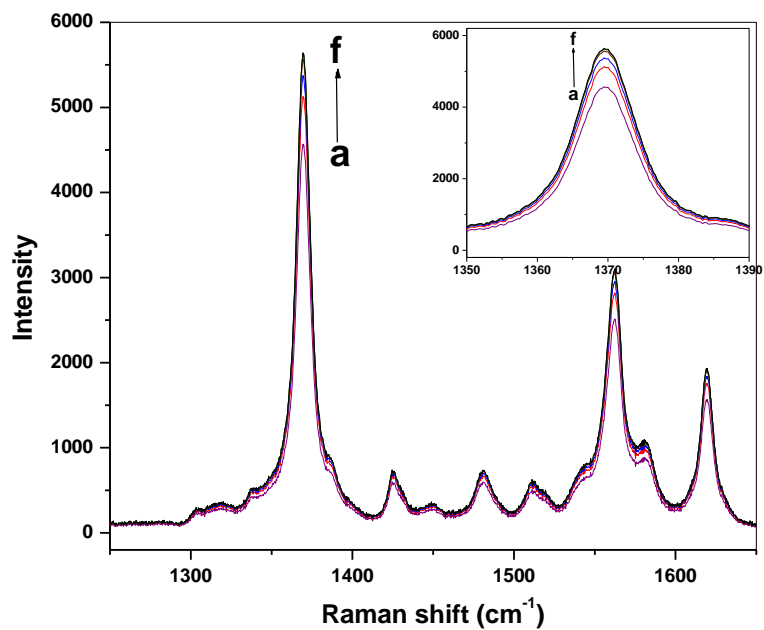

**Fig. S7** SERRS spectra for the mixture of 200 nM metMb and Ag@SiO<sub>2</sub> NPs with respect to time (a) immediate spectrum after the addition of Ag@SiO<sub>2</sub> NPs, (b) after 2 min and (c-f) after 4 to 10 min.
